# Supplementary material for: Elucidating the role of KojR in transcriptional regulation of carbon metabolism for kojic acid biosynthesis in Aspergillus oryzae
Source: Preprints.org preprint supplement (doi:10.20944/preprints202401.0499.v1), 2024-01-05
Supplement: Supplementary file 1 [file Supplementary Table 1. Oligonucleotides used in this study.docx]

**Supplementary Table 1. Oligonucleotides used in this study.**

| Name | Sequence |
| --- | --- |
| HO-kojR-F | 5´-AGGATTTCAG AATTCATGTC GTTGAATACC GACGATTC-3´ |
| HO-kojR-R | 5´-TAGAGGATCT TATTATTATC TATATCTCTG ACCACCTG-3´ |
| HO-kojR-BD-R | 5´-TAGAGGATCT TATTATTATT CTTCCTCGCT GGGCCGTG-3´ |
| PMAL-IFC-F1 | 5´-TAATAAGATC CTCTAGAGTC GACCTGC-3´ |
| PMAL-IFC-R1 | 5´-GAATTCTGAA ATCCTTCCCT CGATCCC-3´ |
| kojR-F | 5´-ATGTCGTTGA ATACCGACGA TTCC-3´ |
| kojRFull-R | 5´-TTATCTATAT CTCTGACCAC CTGC-3´ |
| kojRBD-R | 5´-TTCTTCCTCG CTGGGCCG-3´ |
| gibson_Full-F | 5´-GGTGGTCAGA GATATAGATA ATGATCCGGC TGCTAACAAA G-3´ |
| gibson_BD-F | 5´-GCCCAGCGAG GAAGAATGAT CCGGCTGCTA ACAAAG-3´ |
| gibson_kojR-R | 5´-GTCGGTATTC AACGACATGA ATTCTGAAAT CCTTCCCTCG-3´ |
| F1-primer | 5´-ATCTCGATCC CGCGAAATTA ATACG-3´ |
| R1-primer | 5´-TCCGGATATA GTTCCTCCTT TCAG-3´ |
| Nextera-Read1 | 5´-TCGTCGGCAG CGTCAGATGT GTATAAGAGA CAG-3´ |
| Nextera-Read2 | 5´-GTCTCGTGGG CTCGGAGATG TGTATAAGAG ACAG-3´ |
| ppAsAC9gwA_F7 | 5´-GATTCCGGTC GGATAAGGAC CGTTTTAGAG CTAGAAATAG CAAGTTAAAA TA-3´ |
| ppAsAC9gwA_R7 | 5´-GGTCCTTATC CGACCGGAAT CACTTGTTCT TCTTTACAAT GATTTATTTA CC-3´ |
| kojR_CP_F | 5´-TTCCGACTGC CCGATAACCT TGTAC-3´ |
| kojR_CP_R | 5´-TGGCCTCCAT GTGTTCTTGG TTAGC-3´ |
| kojR_seq | 5´-CCCGAACCCC CCACTG-3´ |
